# Supplementary material
Source: PubMed Central journal article supplement (PMC7082564)
Supplement: AEM.02607-19-s0001.pdf [file AEM.02607-19-s0001.pdf]

1 **Supplementary Table 1**

2 The expected and observed relative abundance of bacterial species in the DNA extraction  
3 and the PCR step control samples.

| <b>Bacterial taxon</b>                                                                  | <b>Expected abundance</b> | <b>Obtained abundance in the PCR step control sample</b> | <b>Obtained abundance in the DNA extraction control sample</b> |
|-----------------------------------------------------------------------------------------|---------------------------|----------------------------------------------------------|----------------------------------------------------------------|
| <i>Pseudomonas</i>                                                                      | 12.5                      | 7.229                                                    | 10.439                                                         |
| <i>Enterobacteriaceae</i><br>(combination of <i>Escherichia</i> and <i>Salmonella</i> ) | 25.0                      | 19.551                                                   | 31.620                                                         |
| <i>Lactobacillus</i>                                                                    | 12.5                      | 12.153                                                   | 22.332                                                         |
| <i>Enterococcus</i>                                                                     | 12.5                      | 8.202                                                    | 4.976                                                          |
| <i>Staphylococcus</i>                                                                   | 12.5                      | 19.613                                                   | 10.535                                                         |
| <i>Listeria</i>                                                                         | 12.5                      | 13.007                                                   | 0.746                                                          |
| <i>Bacillus</i>                                                                         | 12.5                      | 19.250                                                   | 17.887                                                         |

4
